# Supplementary material
Source: PubMed Central journal article supplement (PMC2561202)
Supplement: NIHMS59449-supplement-01.pdf [file NIHMS59449-supplement-01.pdf]

**Supporting Information for:**

**A proposed role for *Leishmania major* carboxypeptidase in peptide catabolism**

Clara E. Isaza<sup>a</sup>, Xuejun Zhong<sup>b,c</sup>, Lucia E. Rosas<sup>d</sup>, James D. White<sup>b,c</sup>, Rita P.-Y.

Chen<sup>e,f</sup>, George F.-C. Liang<sup>e</sup>, Sunney I. Chan<sup>e</sup>, Abhay R. Satoskar<sup>d,\*</sup>, and Michael K.

Chan<sup>a,b,c,\*</sup>

<sup>a</sup>The Ohio State Biophysics Program, Departments of <sup>b</sup>Chemistry, <sup>c</sup>Biochemistry, and

<sup>d</sup>Microbiology, The Ohio State University, Columbus, OH 43210, and Institutes of

<sup>e</sup>Chemistry and <sup>f</sup>Biological Chemistry, Academia Sinica, Taipei 115, Taiwan

**Table 1.** Substrate specificity of *Lma*CP1 for ZAX substrates.

| Substrate | V <sub>max</sub><br>( $\mu\text{moles}/\text{min}$ ) | K <sub>M</sub> (mM) | k <sub>cat</sub> /K <sub>M</sub> ( $\text{s}^{-1} \text{mM}^{-1}$ ) |
|-----------|------------------------------------------------------|---------------------|---------------------------------------------------------------------|
| ZAK       | 2.3 $\pm$ 0.1                                        | 3.0 $\pm$ 0.4       | 0.73                                                                |
| ZAR       | 12.5 $\pm$ 0.6                                       | 7.0 $\pm$ 0.6       | 1.7                                                                 |
| ZAH       | 9.6 $\pm$ 0.8                                        | 21.4 $\pm$ 3.6      | 0.42                                                                |
| ZAW       | 1.7 $\pm$ 0.07                                       | 1.3 $\pm$ 0.3       | 1.2                                                                 |
| ZAF       | 3.9 $\pm$ 0.9                                        | 12.3 $\pm$ 9.9      | 0.30                                                                |
| ZAI       | 2.8 $\pm$ 0.04                                       | 1.2 $\pm$ 0.1       | 2.3                                                                 |
| ZAA       | 19.9 $\pm$ 1.3                                       | 6.8 $\pm$ 1.1       | 2.8                                                                 |
| ZAV       | 6.6 $\pm$ 0.6                                        | 5.6 $\pm$ 1.5       | 1.1                                                                 |
| ZAS       | 7.7 $\pm$ 0.5                                        | 6.7 $\pm$ 1.2       | 1.1                                                                 |
| ZAM       | 7.4 $\pm$ 0.7                                        | 7.8 $\pm$ 2.0       | 0.89                                                                |

<sup>a</sup>The cleavage rate of the ZAY, ZAN, and ZAE substrates were too slow to be measured accurately.
